# Supplementary material for: Assessment of Anti-tumor Efficacy of Osimertinib in Non–Small Cell Lung Cancer Patients by Liquid Biopsy Using Bronchoalveolar Lavage Fluid, Plasma, or Pleural Effusion
Source: PubMed Central journal article supplement — Cancer Res Treat. 2022 Jan 17;54(4):985–95. doi: 10.4143/crt.2021.857 (PMC9582461; doi:10.4143/crt.2021.857), 2022-01-17
Supplement: crt-2021-857_S3-Fig.pdf [file crt-2021-857_S3-Fig.pdf]

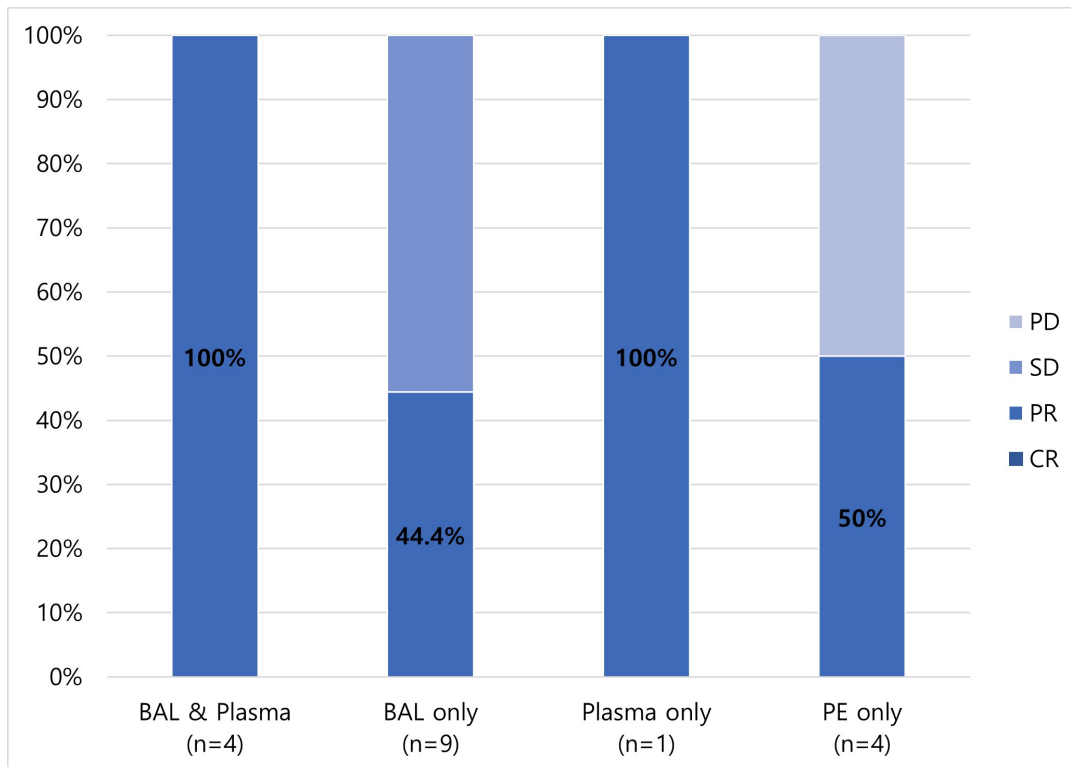

**S3 Fig.** Objective response rates (ORRs) by T790M positivity status in liquid biopsy samples. ORRs according to Response Evaluation Criteria in Solid Tumors in the response evaluable population are shown by T790M positivity in type of liquid biopsy samples. BAL, bronchoalveolar lavage fluid; CR, complete response; PD, progression of disease; PE, pleural effusion; PR, partial response; SD, stable disease; T790M, (c.2369C>T; p.Thr790Met).
